# Supplementary material for: Standardized orthotopic xenografts in zebrafish reveal glioma cell line specific characteristics and tumor cell heterogeneity
Source: Oxford University Press journal article supplement (doi:10.1242/dmm.022921), 2015-01-01
Supplement: dmm022921supp.pdf [file dmm022921supp.pdf]

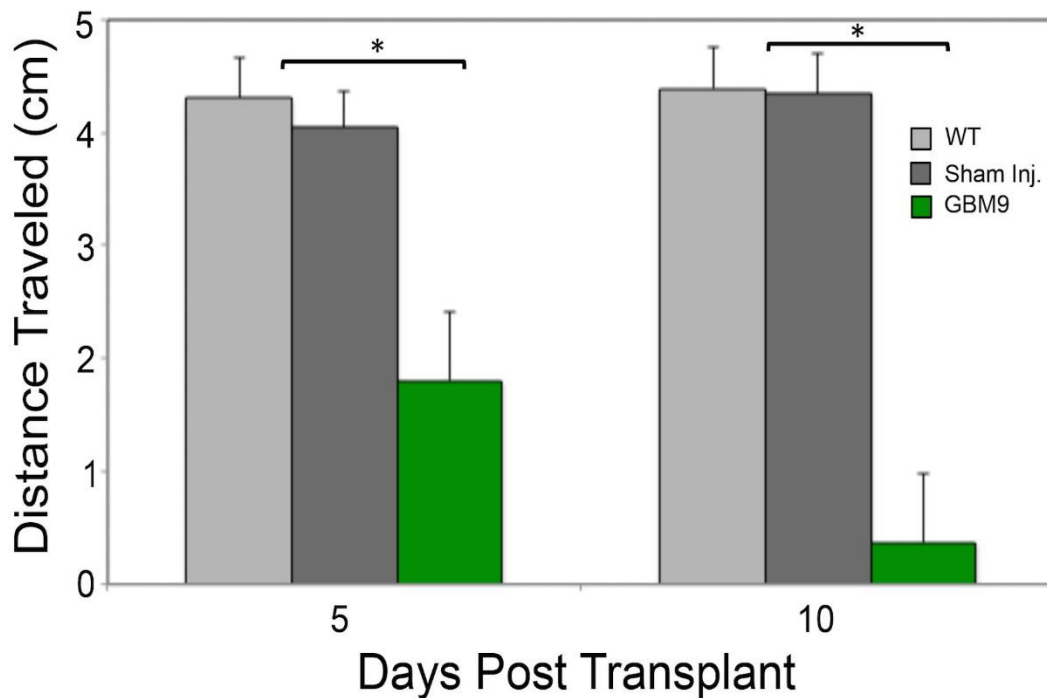

**Fig. S1: Movement defects in GBM9 transplanted animals**

During our analysis, we observed that zebrafish containing GBM9 cells did not move normally. To quantify this defect, we performed a touch-evoked swimming assay on 5 and 10 dpt. Wild-type (light grey bars) and sham injected (dark grey bars) zebrafish moved on average 4.2 cm radially from the center of a 10 cm dish while GBM9 tumor bearing animals (green bars) moved  $1.8 \pm 1.1$  and  $0.3 \pm 0.6$  cm and 5 and 10 dpt respectively. Tumor bearing animals perform significantly worse in the touch-evoked swim assay at both 5 and 10 dpt as compared to wild-type and sham injected animals. At day 5, when GBM9 transplanted fish did move, they often exhibited abnormal movements such as twitches, circling and abnormal posture in the water. This indicates that tumor-bearing fish do not initiate swimming movements compared to wild-type animals and impairment worsens over time suggesting that the tumor growth is impairing brain function.

Supplementary Table 1

Statistics for Figure 1A

| Group         | mNSC    | Sham-Injected | GBM9 51-90 | GBM9 91-140 | X12 51-90 | X12 91-140 |
|---------------|---------|---------------|------------|-------------|-----------|------------|
| mNSC          |         | ns            | <0.0001    | <0.0001     | 0.0049    | <0.0001    |
| Sham-Injected | ns      |               | <0.0001    | <0.0001     | 0.0059    | <0.0001    |
| GBM9 51-91    | <0.0001 | <0.0001       |            | 0.0004      | <0.0001   | <0.0001    |
| GBM9 91-140   | <0.0001 | <0.0001       | 0.0004     |             | <0.0001   | <0.0001    |
| X12 51-90     | 0.0049  | 0.0059        | <0.0001    | <0.0001     |           | 0.0002     |
| X12 91-140    | <0.0001 | <0.0001       | <0.0001    | <0.0001     | 0.0002    |            |

Statistics for Figure 1B

| Group        | 10-25 cells | 26-50 cells | 51-90 cells | 91-140 cells |
|--------------|-------------|-------------|-------------|--------------|
| 10-25 cells  |             | <0.0001     | <0.0001     | <0.0001      |
| 26-50 cells  | <0.0001     |             | <0.0001     | <0.0001      |
| 51-90 cells  | <0.0001     | <0.0001     |             | 0.0004       |
| 91-140 cells | <0.0001     | <0.0001     | 0.0004      |              |

Statistics for Figure 7F

| Group     | WT Bort | GBM9 Bort | WT TMZ  | GBM9 TMZ | GBM9 DMSO |
|-----------|---------|-----------|---------|----------|-----------|
| WT Bort   |         | 0.0055    | ns      | ns       | <0.0001   |
| GBM9 Bort | 0.0055  |           | 0.0160  | ns       | 0.0002    |
| WT TMZ    | ns      | 0.0160    |         | ns       | <0.0001   |
| GBM9 TMZ  | ns      | ns        | ns      |          | <0.0001   |
| GBM9 DMSO | <0.0001 | 0.0002    | <0.0001 | <0.0001  |           |
